# Supplementary material for: Profiling of primary and phytonutrients in edible mahlab cherry (Prunus mahaleb L.) seeds in the context of its different cultivars and roasting as analyzed using molecular networking and chemometric tools
Source: PeerJ. 2023 Aug 30;11:e15908. doi: 10.7717/peerj.15908 (PMC10474835; doi:10.7717/peerj.15908)
Supplement: Supplemental Information 14 — White seeds obtained from Athens, Greece (EGM), white seeds obtained from Cairo, Egypt (WEM), red seeds obtained from Cairo, Egypt (REM) and roasted red seeds (RREM). [file peerj-11-15908-s014.xlsx]

## Sheet: negative mode
ID	161.02/4.41	966/16.76	191.02/0.85	955.97/16.88	133.01/0.64	502.16/3.04	966/18.4	966/0.54	955.97/16.7	955.97/18.4	966/13.12	181.07/0.58	439.09/0.63	191.02/0.64	957.97/21.16	955.97/19.64	133.01/0.81	115.92/19.53	340.1/3.69	115.92/18.31	377.09/0.6	325.08/2.85	341.11/0.61	573.98/4.41	115.92/19.21	387.11/0.61	431.35/22.12	330.07/3.69	456.15/3.04	121.05/3.53	564.33/13.13	700.03/4.41	115.92/19.98	355.1/3.35	651.18/2.85	187.1/5.43	683.22/0.62	566.34/14.31	195.05/0.59	117.02/0.98	758.22/22.51	128.04/0.86	477.16/2.71	99.93/18.3	1065.92/16.74	404.1/0.62	525.38/19.97	99.93/19.54	595.29/14.41
EGM2	5.26578e+06	0	80698.8	0	63538.5	140853	0	770881	0	0	0	163900	37713.9	22663.2	0	0	13555.6	516159	59684.8	566057	111579	2.18288e+06	712831	186247	436627	642518	333723	0	31313.2	74785.2	13340.2	97306.1	292716	1.4406e+06	5.29375e+06	71825.1	193164	19503.3	1.12163e+06	29076	0	100550	61847.8	202636	0	34859.6	48374.9	172934	106942
EGM1	5.40283e+06	309601	115456	0	78464.6	164690	0	684703	111398	0	0	171334	49122.7	30975.2	0	0	16885.3	525650	72432.9	553331	120801	2.33229e+06	727535	316391	548494	671161	435587	0	35463.1	88498.1	12737.8	166228	0	1.57391e+06	5.76391e+06	144896	190305	18667	1.20847e+06	47813.7	0	112913	65362.8	207116	24895.8	37079.1	136019	171913	121496
EGM3	6.01689e+06	0	603782	0	208344	196668	0	736564	0	0	0	117625	67483.8	186901	0	0	48695.5	642676	90776.5	654561	511042	2.32865e+06	574602	252915	576981	520721	62323.1	0	42965.8	105737	20793.6	148123	402495	1.50661e+06	5.67935e+06	148905	147123	26546	1.09286e+06	57220.7	0	98564.2	84291.7	219908	0	15674.3	112690	192777	185539
REM3	5.65176e+06	1.09149e+06	820212	0	1.2897e+06	1.10772e+06	0	852360	0	0	1.56122e+06	0	635334	688787	0	0	747517	614233	299712	635254	106150	601285	353659	337381	492162	300525	0	196726	251592	154021	428417	173140	132658	442055	582704	112206	96931	327163	339211	168842	0	77443.8	95771.8	251565	53016	0	29287.6	180639	392163
REM2	6.03262e+06	0	911712	0	1.39411e+06	1.07215e+06	0	709167	0	0	0	0	571137	728557	0	0	639276	630121	397135	629791	158692	468136	348243	290374	547032	234647	0	261276	243006	180777	423891	168351	302429	317189	372016	132574	69168.1	341675	268792	186204	0	79969.3	103148	235862	0	0	82052.1	202077	439883
REM1	5.71103e+06	0	1.01191e+06	0	1.49438e+06	1.07782e+06	0	750996	0	0	1.56192e+06	0	393294	831721	0	0	705656	660659	334877	683781	699254	474063	233659	308464	578428	202902	5159.41	229030	235721	299445	421988	178711	339728	352164	411509	109152	26026.2	346632	163332	173025	0	72599.1	116966	247147	0	0	80106.4	190318	455775
WEM1	5.21808e+06	0	533656	0	209482	189346	0	649015	0	0	1.12248e+06	51731.9	39707.4	80334.2	0	0	66052.3	791652	60371.3	0	635630	2.19425e+06	844775	240306	0	748764	804100	0	39756.4	86487.2	250478	121263	0	1.48514e+06	5.37014e+06	66010	258608	188953	152044	41795.6	365747	83524.4	110890	0	0	37999.7	15981.6	251226	355860
WEM2	5.85531e+06	0	419968	0	264430	201391	0	675608	0	0	1.86503e+06	0	46309.1	69453.2	0	0	88234	845402	107699	0	913558	2.15422e+06	713055	265810	717184	607504	332116	0	45205.5	98472	274093	159554	0	1.46693e+06	5.21767e+06	73974.3	197588	204057	155103	50428.8	0	91771.1	120477	0	0	20451.4	5626.49	267990	424319
WEM3	5.28688e+06	0	360544	0	334176	212899	0	829631	0	0	0	0	48233.8	69059.2	0	0	129545	862411	83525.9	0	963138	2.31911e+06	597641	253370	769589	509455	0	0	46112.1	103274	271916	136703	0	1.56955e+06	5.56096e+06	62469.9	138994	192292	160455	58997.8	0	86512.6	109927	0	0	20460.7	5046.66	268506	384019
RREM2	5.33117e+06	0	699189	0	1.32214e+06	943481	0	694004	0	0	0	205563	495712	520425	0	0	603671	563497	295520	486147	134257	306044	369307	248174	439316	324782	635312	196354	210626	209552	280013	122393	138264	161260	167241	124064	108064	242946	38619.7	134724	0	91128.3	81111.1	198679	0	0	26137.9	182441	162636
RREM1	5.092e+06	3.11221e+06	797080	1.92838e+06	1.27091e+06	909083	455689	834440	1.04381e+06	303313	1.32904e+06	181479	498140	569864	622250	156441	594652	485887	284396	499099	146297	223053	322959	240132	399614	247326	676772	184551	204899	177008	256735	117940	333024	125771	90414.7	108111	98178.1	229214	44200.5	125308	235248	85443.1	78069.2	191814	231073	30877	68744.6	164630	161853
RREM3	5.53998e+06	0	820883	0	1.322e+06	1.00185e+06	0	890849	0	0	1.4985e+06	206357	376759	555621	0	0	616187	495025	306332	475391	139587	319390	366896	284078	427867	328646	0	203421	221909	193914	314626	141987	131424	182210	168733	110685	112303	280476	48271.8	121461	0	90282.8	83043.2	201161	0	18355.3	26933.1	165207	185298
[truncated: 3,126 more columns]

## Sheet: pos mode
ID	104.11/0.58	177.05/3.36	177.05/6.95	344.13/2.85	304.3/11.56	332.33/12.96	130.08/0.85	195.07/3.36	147.04/2.86	374.14/3.35	130.08/0.64	312.36/14.28	134.06/1.73	163.04/4.41	166.09/1.51	376.16/3.89	147.04/5.92	346.15/3.55	415.21/11.74	120.08/1.51	165.05/2.85	268.1/0.89	106.07/1.73	506.19/2.43	146.06/1.61	284.33/12.89	177.05/4.28	475.19/3.04	922.01/0.51	195.06/4.28	445.18/3.44	170.15/7.98	137.06/3.89	175.12/0.53	450.2/2.71	156.14/6.46	381.08/0.58	103.05/2.85	432.24/11.74	153.05/3.36	351.1/3.55	266.16/0.54	381.11/3.9	123.04/2.85	188.07/2.21	336.11/1.72	806.57/19.55	116.07/0.61	349.09/2.88
EGM2	2.60293e+07	1.2628e+07	9.60779e+06	1.07585e+07	6.36619e+06	6.54089e+06	3.492e+06	9.599e+06	8.94966e+06	7.4725e+06	3.34532e+06	5.45243e+06	4.77232e+06	3.22306e+06	2.93807e+06	2.37647e+06	2.98896e+06	2.29505e+06	2.71805e+06	2.57561e+06	4.06802e+06	1.9625e+06	3.54538e+06	1.88031e+06	2.77758e+06	2.57625e+06	1.52587e+06	1.63521e+06	1.82023e+06	1.40572e+06	1.29844e+06	1.49472e+06	1.22706e+06	693902	983748	1.21075e+06	2.66845e+06	2.05606e+06	1.29417e+06	1.81029e+06	1.21782e+06	292179	1.07843e+06	1.7609e+06	888784	1.79228e+06	1.07049e+06	905137	1.28119e+06
EGM1	2.62728e+07	1.24422e+07	9.82286e+06	1.05524e+07	6.39119e+06	6.54108e+06	3.37582e+06	9.49747e+06	8.69936e+06	7.20924e+06	3.06011e+06	5.33814e+06	5.05406e+06	3.2303e+06	3.22957e+06	2.37291e+06	3.34886e+06	2.35025e+06	968297	2.78411e+06	4.0469e+06	2.03221e+06	3.7123e+06	1.90098e+06	3.10187e+06	2.56181e+06	1.39888e+06	1.54664e+06	0	1.29061e+06	1.33377e+06	1.79614e+06	1.23211e+06	807158	939076	1.57351e+06	2.64917e+06	2.04903e+06	430255	1.78444e+06	1.24111e+06	306616	1.0752e+06	1.7772e+06	952510	1.85004e+06	1.89547e+06	869995	1.33053e+06
EGM3	2.72621e+07	1.3005e+07	1.24648e+07	1.08101e+07	7.97045e+06	8.18217e+06	3.83316e+06	9.99246e+06	9.16441e+06	7.58943e+06	3.2905e+06	4.80468e+06	5.95913e+06	3.76005e+06	4.59139e+06	3.08637e+06	4.2565e+06	3.05414e+06	3.65474e+06	4.1598e+06	4.1256e+06	2.65657e+06	4.50584e+06	2.41438e+06	4.48682e+06	2.402e+06	2.0127e+06	1.98396e+06	0	1.82085e+06	1.75007e+06	1.98757e+06	1.64368e+06	838520	1.31335e+06	1.80818e+06	2.63146e+06	2.12785e+06	1.46032e+06	1.88252e+06	1.26043e+06	337378	1.13474e+06	1.84953e+06	1.42002e+06	1.8828e+06	0	1.00422e+06	1.18432e+06
REM3	1.43791e+07	2.28281e+06	450551	2.03318e+06	6.1653e+06	6.43173e+06	0	1.71996e+06	1.38858e+06	1.52781e+06	609471	4.697e+06	1.7092e+06	3.24245e+06	2.31896e+06	53478.1	44117.7	82382.8	1.15957e+06	2.03744e+06	627692	3.07261e+06	1.57237e+06	32944	462862	2.32757e+06	59616.1	8.3626e+06	0	55871.6	11612.8	37778	32810	107842	1.45472e+06	174827	859395	357286	543387	317610	52273.6	0	29781.2	288686	932342	279952	926181	0	0
REM2	1.43806e+07	1.81426e+06	299913	1.74151e+06	7.65563e+06	7.86518e+06	0	1.35392e+06	1.23555e+06	1.20899e+06	582185	5.03888e+06	1.89355e+06	3.65076e+06	2.74847e+06	33567.7	41972.9	66251.9	1.67058e+06	2.4468e+06	544643	3.38675e+06	1.71234e+06	41576	488789	2.4055e+06	49702.2	8.7951e+06	0	49083.3	6123.28	38500.6	23785.4	0	1.65551e+06	184380	835926	316303	611621	252752	0	0	15829.5	250913	1.09825e+06	321169	995239	0	0
REM1	1.40803e+07	1.97126e+06	583339	1.6783e+06	7.60544e+06	7.85737e+06	0	1.4655e+06	1.18697e+06	1.27695e+06	593974	5.06801e+06	1.81739e+06	3.45749e+06	2.96961e+06	47669.4	57274.3	84920.3	1.78291e+06	2.63925e+06	533910	3.3042e+06	1.67222e+06	44170.4	636254	2.36098e+06	48270	8.74087e+06	0	44499.3	11249.2	73154.1	35861	0	1.75541e+06	140882	848579	298924	939334	274576	38530.5	0	18171.6	235830	1.18912e+06	261175	1.43938e+06	0	0
WEM1	1.36748e+07	1.30906e+07	1.06391e+07	1.09505e+07	6.46793e+06	6.63548e+06	5.66308e+06	1.00018e+07	9.07933e+06	7.57878e+06	4.84341e+06	5.29711e+06	4.59771e+06	3.2168e+06	4.36617e+06	3.07958e+06	2.34352e+06	2.66963e+06	1.25552e+06	3.90573e+06	4.16534e+06	1.70719e+06	3.43342e+06	2.39093e+06	4.71879e+06	2.62594e+06	2.13849e+06	2.24167e+06	0	1.95032e+06	957423	518339	1.62131e+06	2.29612e+06	1.95643e+06	246791	2.53665e+06	2.14753e+06	599766	1.85867e+06	1.28376e+06	66954.9	1.13408e+06	1.84904e+06	1.83306e+06	1.74053e+06	3.19404e+06	1.0922e+06	1.28508e+06
WEM2	1.3446e+07	1.30719e+07	1.09349e+07	1.08665e+07	7.90442e+06	8.18145e+06	5.48328e+06	9.98604e+06	9.00445e+06	7.57467e+06	4.54663e+06	5.49632e+06	5.17692e+06	3.66275e+06	4.7095e+06	3.39078e+06	2.33874e+06	2.61321e+06	2.71064e+06	4.31674e+06	4.09147e+06	1.97076e+06	3.91558e+06	2.05479e+06	5.11373e+06	2.54093e+06	2.36392e+06	2.25354e+06	0	2.16262e+06	1.03677e+06	554334	1.81773e+06	2.34603e+06	1.94396e+06	179726	2.26321e+06	2.14503e+06	1.06842e+06	1.85214e+06	1.20168e+06	75138.5	1.09506e+06	1.83809e+06	2.08829e+06	1.88983e+06	3.04123e+06	1.23246e+06	0
WEM3	1.9807e+07	1.28455e+07	1.15144e+07	1.0676e+07	6.53448e+06	6.73425e+06	4.92545e+06	9.88243e+06	8.77291e+06	7.56331e+06	4.24814e+06	5.11164e+06	4.93316e+06	3.11416e+06	4.58761e+06	3.14193e+06	2.62084e+06	2.52846e+06	1.41074e+06	4.12612e+06	3.95422e+06	1.87423e+06	3.70119e+06	1.57689e+06	4.63313e+06	2.38798e+06	2.14253e+06	2.15158e+06	0	1.96643e+06	964286	586367	1.6946e+06	2.31082e+06	1.55677e+06	161496	1.85081e+06	2.11826e+06	682294	1.81945e+06	1.18024e+06	0	1.07213e+06	1.81476e+06	1.90946e+06	1.85037e+06	2.41967e+06	1.21053e+06	1.2322e+06
RREM1	1.59287e+07	697648	451729	816804	6.28529e+06	6.45081e+06	722885	520698	563795	447016	532956	5.25473e+06	1.03497e+06	3.09104e+06	290583	20459.8	50433.1	35535.5	1.2878e+06	246955	242324	1.9602e+06	919478	23096.6	0	2.57784e+06	16343.4	7.02204e+06	3.72246e+06	15420.3	4218.85	0	0	0	966167	193136	1.08795e+06	135377	634438	92246.6	14896.3	0	0	108538	85522.1	188484	944278	0	0
RREM3	1.52321e+07	786485	483952	924528	6.10168e+06	6.35687e+06	691927	612502	678347	535447	0	4.93531e+06	1.06368e+06	2.99707e+06	153052	16895.8	51447.2	33605.1	1.42847e+06	134117	282272	1.98826e+06	964588	20631.7	0	2.35576e+06	19820.5	6.49481e+06	3.24959e+06	0	3858.98	0	0	0	861183	174385	1.00933e+06	165496	683707	106046	12973.4	0	0	131751	43558.8	190976	0	0	477030
RREM2	1.59001e+07	809801	539859	987512	6.44398e+06	6.72958e+06	767943	611970	722874	531229	0	4.90616e+06	1.08341e+06	3.1404e+06	160754	20192	60911.8	37040.6	1.87645e+06	138381	308476	2.01978e+06	977155	22057	0	2.61074e+06	19113.6	6.92681e+06	3.55772e+06	0	2936.05	0	0	0	919092	212120	1.00293e+06	173660	901023	108438	13508	0	0	139543	0	189713	0	0	0
[truncated: 5,000 more columns]
